# Supplementary material
Source: publisher site journal article supplement (https://www.dovepress.com/article/291004)
Supplement: Supplementary file 1 [file get_supplementary_file.php]

Supplementary Table 1. Weighted prevalence rates of high psychological distress by impairment types, with and without comorbid psychosocial impairment

| Types                                                    | with psychosocial impairment | without psychosocial impairment |
|----------------------------------------------------------|------------------------------|---------------------------------|
| Sensory/speech impairments                               | 0.64, 0.59-0.69              | 0.07, 0.06-0.09                 |
| Intellectual impairments                                 | 0.73, 0.68-0.77              | 0.39, 0.29-0.48                 |
| Physical restrictions                                    | 0.74, 0.71-0.77              | 0.24, 0.22-0.25                 |
| Traumatic head injuries, stroke or acquired brain injury | 0.63, 0.56-0.70              | 0.07, 0-0.21                    |

Supplementary Table 2.1. Odds ratios and 95% confidence intervals of predisposing factors in relation to high psychological distress by different impairment types without excluding comorbid psychosocial impairment

| Variables*                     | All                | Sensory            | Intellectual        | Physical           | Psychosocial       | Head injury         |
|--------------------------------|--------------------|--------------------|---------------------|--------------------|--------------------|---------------------|
| Predisposing factors           |                    |                    |                     |                    |                    |                     |
| Age (years)                    |                    |                    |                     |                    |                    |                     |
| <=44                           |                    |                    |                     |                    |                    |                     |
| 45-64                          | 0.79,<br>0.64-0.98 | 1.12,<br>0.68-1.83 | 0.75,<br>0.37-1.52  | 0.78,<br>0.6-1.01  | 0.89,<br>0.58-1.36 | 0.71,<br>0.27-1.87  |
| 65-84                          | 0.43,<br>0.32-0.56 | 0.64,<br>0.35-1.15 | 0.45,<br>0.14-1.42  | 0.4,<br>0.29-0.56  | 0.71,<br>0.38-1.34 | 0.14,<br>0.04-0.43  |
| >=85                           | 0.31,<br>0.20-0.49 | 0.38,<br>0.18-0.78 | 0.04,<br>0.01-0.27  | 0.26,<br>0.16-0.44 | 0.47,<br>0.16-1.35 | 0.05,<br>0.01-0.26  |
| Country of birth               |                    |                    |                     |                    |                    |                     |
| Australia                      |                    |                    |                     |                    |                    |                     |
| Main English speaking          | 1.17,<br>0.95-1.45 | 1.21,<br>0.84-1.75 | 1.78,<br>0.80-3.99  | 1.20,<br>0.94-1.53 | 1.38,<br>0.83-2.29 | 1.45,<br>0.61-3.43  |
| Non-English speaking           | 2.24,<br>1.86-2.69 | 2.27,<br>1.56-3.31 | 3.32,<br>1.2-9.23   | 2.36,<br>1.91-2.91 | 1.77,<br>1.02-3.08 | 3.47,<br>1.50-8.01  |
| Marital Status                 |                    |                    |                     |                    |                    |                     |
| Married                        |                    |                    |                     |                    |                    |                     |
| Separated                      | 1.00,<br>0.72-1.38 | 1.63,<br>0.89-3.00 | 2.27,<br>0.46-11.24 | 0.93,<br>0.64-1.33 | 1.20,<br>0.62-2.33 | 0.78,<br>0.18-3.38  |
| Divorced                       | 0.74,<br>0.60-0.92 | 0.87,<br>0.56-1.36 | 0.80,<br>0.31-2.02  | 0.75,<br>0.59-0.95 | 0.77,<br>0.47-1.27 | 0.93,<br>0.39-2.24  |
| Widowed                        | 0.64,<br>0.50-0.82 | 0.71,<br>0.47-1.09 | 1.41,<br>0.47-4.21  | 0.67,<br>0.51-0.88 | 0.62,<br>0.33-1.15 | 0.66,<br>0.26-1.70  |
| Never married                  | 0.77,<br>0.63-0.94 | 0.81,<br>0.52-1.24 | 2.07,<br>1.13-3.82  | 0.67,<br>0.52-0.86 | 0.85,<br>0.56-1.30 | 0.62,<br>0.29-1.31  |
| Sex                            |                    |                    |                     |                    |                    |                     |
| Male                           |                    |                    |                     |                    |                    |                     |
| Female                         | 0.96,<br>0.83-1.12 | 0.94,<br>0.69-1.26 | 1.25,<br>0.73-2.14  | 0.84,<br>0.70-1.00 | 1.08,<br>0.77-1.50 | 1.15,<br>0.62-2.13  |
| Highest educational attainment |                    |                    |                     |                    |                    |                     |
| Bachelor's degree or higher    |                    |                    |                     |                    |                    |                     |
| Diploma or certificate         | 1.38,<br>1.13-1.7  | 1.36,<br>0.92-2.02 | 3.23,<br>1.22-8.56  | 1.25,<br>0.98-1.59 | 1.65,<br>1.04-2.61 | 1.61,<br>0.64-4.07  |
| High school                    | 1.47,<br>1.21-1.79 | 1.33,<br>0.92-1.92 | 2.56,<br>1.02-6.44  | 1.46,<br>1.17-1.83 | 1.59,<br>1.05-2.42 | 1.54,<br>0.62-3.83  |
| Not finish high school         | 2.06,<br>1.61-2.64 | 1.93,<br>1.24-3.02 | 6.67,<br>2.16-20.63 | 1.81,<br>1.37-2.38 | 3.57,<br>1.88-6.76 | 4.67,<br>1.57-13.94 |
| Housing tenure                 |                    |                    |                     |                    |                    |                     |
| Outright owner                 |                    |                    |                     |                    |                    |                     |
| Owner with a mortgage          | 1.12,<br>0.92-1.36 | 1.17,<br>0.77-1.77 | 1.78,<br>0.63-5.00  | 0.97,<br>0.78-1.21 | 1.28,<br>0.80-2.03 | 0.9,<br>0.39-2.05   |
| Renter                         | 1.26,<br>1.05-1.51 | 1.47,<br>1.03-2.09 | 0.81,<br>0.34-1.94  | 1.25,<br>1.02-1.53 | 1.34,<br>0.90-1.99 | 1.23,<br>0.62-2.44  |
| Rurality of residence          |                    |                    |                     |                    |                    |                     |

|                             |           |           |           |           |           |           |
|-----------------------------|-----------|-----------|-----------|-----------|-----------|-----------|
| Major cities                |           |           |           |           |           |           |
|                             | 0.78,     | 0.82,     | 0.97,     | 0.83,     | 0.85,     | 1.26,     |
| Inner regional              | 0.66-0.92 | 0.60-1.13 | 0.55-1.71 | 0.69-1.00 | 0.59-1.22 | 0.66-2.4  |
|                             | 1.00,     | 1.06,     | 0.49,     | 1.08,     | 0.97,     | 1.31,     |
| Outer regional              | 0.83-1.22 | 0.74-1.54 | 0.25-0.97 | 0.86-1.34 | 0.63-1.51 | 0.61-2.82 |
| Government concession cards |           |           |           |           |           |           |
| No                          |           |           |           |           |           |           |
|                             | 1.35,     | 1.54,     | 0.74,     | 1.31,     | 1.21,     | 2.87,     |
| Yes                         | 1.14-1.61 | 1.03-2.30 | 0.38-1.45 | 1.06-1.60 | 0.81-1.80 | 1.20-6.86 |

\*Unclassified categories were not presented.

Supplementary Table 2.2 Odds ratios and 95% confidence intervals of enabling factors in relation to high psychological distress by different impairment types without excluding comorbid psychosocial impairment

| Variables*                                                                                     | All                | Sensory            | Intellectual       | Physical           | Psychosocial       | Head injury        |
|------------------------------------------------------------------------------------------------|--------------------|--------------------|--------------------|--------------------|--------------------|--------------------|
| Communication limitation                                                                       |                    |                    |                    |                    |                    |                    |
| No                                                                                             |                    |                    |                    |                    |                    |                    |
| Yes                                                                                            | 1.54,<br>1.27-1.89 | 1.32,<br>0.99-1.75 | 2.56,<br>1.33-5.00 | 1.37,<br>1.08-1.75 | 1.85,<br>1.18-2.94 | 1.56,<br>0.82-2.94 |
| Whether has avoided situations due to disability in the last 12 months                         |                    |                    |                    |                    |                    |                    |
| No                                                                                             |                    |                    |                    |                    |                    |                    |
| Yes                                                                                            | 1.23,<br>1.05-1.44 | 1.30,<br>0.95-1.77 | 1.62,<br>0.95-2.78 | 1.23,<br>1.03-1.47 | 1.50,<br>1.08-2.08 | 1.84,<br>1.04-3.26 |
| Feelings of safety home alone during the day                                                   |                    |                    |                    |                    |                    |                    |
| Safe                                                                                           |                    |                    |                    |                    |                    |                    |
| Unsafe                                                                                         | 1.42,<br>1.05-1.92 | 0.52,<br>0.28-0.97 | 1.85,<br>0.77-4.50 | 1.36,<br>0.96-1.94 | 2.67,<br>1.43-4.98 | 0.79,<br>0.25-2.47 |
| Feelings of safety home alone after dark                                                       |                    |                    |                    |                    |                    |                    |
| Safe                                                                                           |                    |                    |                    |                    |                    |                    |
| Unsafe                                                                                         | 1.61,<br>1.31-1.99 | 2.09,<br>1.32-3.30 | 0.90,<br>0.45-1.80 | 1.74,<br>1.36-2.21 | 1.33,<br>0.90-1.98 | 1.53,<br>0.62-3.77 |
| Whether leaves home as often as would like                                                     |                    |                    |                    |                    |                    |                    |
| As often as would like                                                                         |                    |                    |                    |                    |                    |                    |
| Not as often as would like                                                                     | 1.78,<br>1.53-2.07 | 1.63,<br>1.22-2.20 | 1.47,<br>0.87-2.49 | 1.84,<br>1.55-2.17 | 2.01,<br>1.45-2.79 | 1.89,<br>1.05-3.4  |
| Whether support is available in a time of crisis from someone not living in the same household |                    |                    |                    |                    |                    |                    |
| No                                                                                             |                    |                    |                    |                    |                    |                    |
| Yes                                                                                            | 0.75,<br>0.59-0.95 | 0.79,<br>0.49-1.27 | 0.83,<br>0.33-2.14 | 0.77,<br>0.59-1.01 | 0.71,<br>0.41-1.24 | 1.51,<br>0.58-3.91 |
| Whether attended selected cultural venues and events in last 12 months                         |                    |                    |                    |                    |                    |                    |
| No                                                                                             |                    |                    |                    |                    |                    |                    |
| Yes                                                                                            | 0.74,<br>0.64-0.85 | 0.67,<br>0.51-0.89 | 0.40,<br>0.24-0.67 | 0.70,<br>0.60-0.83 | 0.85,<br>0.62-1.17 | 0.63,<br>0.36-1.13 |

Supplementary Table 2.3 Odds ratios and 95% confidence intervals of health-need factors in relation to high psychological distress by different impairment types without excluding comorbid psychosocial impairment

| Variables*                                                                   | All              | Sensory           | Intellectual     | Physical         | Psychosocial    | Head injury       |
|------------------------------------------------------------------------------|------------------|-------------------|------------------|------------------|-----------------|-------------------|
| Saw GP in last 12 months                                                     |                  |                   |                  |                  |                 |                   |
| No need                                                                      |                  |                   |                  |                  |                 |                   |
| Delayed due to cost                                                          | 1.78, 1.09-2.91  | 1.21, 0.50-2.96   | 1.51, 0.29-7.72  | 1.92, 1.01-3.64  | 1.08, 0.38-3.01 | 1.10, 0.10-12.43  |
| Delayed due to other reasons                                                 | 1.60, 1.06-2.41  | 0.81, 0.41-1.63   | 1.25, 0.33-4.76  | 1.78, 1.03-3.08  | 0.99, 0.41-2.38 | 1.10, 0.19-6.46   |
| When needed                                                                  | 1.13, 0.76-1.69  | 0.52, 0.27-1.02   | 1.03, 0.28-3.87  | 1.31, 0.77-2.25  | 0.67, 0.29-1.57 | 0.57, 0.10-3.22   |
| Went to hospital in last 12 months                                           |                  |                   |                  |                  |                 |                   |
| No need                                                                      |                  |                   |                  |                  |                 |                   |
| Delayed due to cost                                                          | 4.22, 1.22-14.59 | 4.22, 1.22-14.59  | 1.21, 0.06-23.98 | 3.89, 0.96-15.66 | 1.65, 0.41-6.63 | 8.45, 0.27-267.92 |
| Delayed due to other reasons                                                 | 1.21, 0.76-1.92  | 1.21, 0.76-1.92   | 1.54, 0.44-5.34  | 1.23, 0.71-2.15  | 1.41, 0.59-3.38 | 2.70, 0.34-21.24  |
| When needed                                                                  | 1.01, 0.86-1.18  | 1.01, 0.86-1.18   | 1.14, 0.61-2.11  | 0.95, 0.79-1.13  | 1.31, 0.92-1.88 | 1.23, 0.70-2.17   |
| Saw 3 or more health professionals for the same condition in last 12 months  |                  |                   |                  |                  |                 |                   |
| No                                                                           |                  |                   |                  |                  |                 |                   |
| Yes                                                                          | 1.10, 0.95-1.28  | 1.04, 0.78-1.40   | 1.63, 0.95-2.80  | 1.10, 0.93-1.30  | 0.97, 0.71-1.34 | 1.22, 0.68-2.21   |
| Saw a dental professional in last 12 months                                  |                  |                   |                  |                  |                 |                   |
| No need                                                                      |                  |                   |                  |                  |                 |                   |
| Delayed due to cost                                                          | 1.32, 1.09-1.60  | 24.27, 1.24-476.1 | 1.23, 0.63-2.41  | 1.31, 1.04-1.64  | 1.17, 0.78-1.75 | 0.90, 0.40-2.03   |
| Delayed due to other reasons                                                 | 0.90, 0.70-1.16  | 2.23, 0.65-7.58   | 0.29, 0.10-0.79  | 0.89, 0.66-1.19  | 0.76, 0.45-1.29 | 0.96, 0.36-2.58   |
| When needed                                                                  | 0.93, 0.79-1.08  | 1.05, 0.78-1.40   | 0.40, 0.22-0.73  | 1.05, 0.88-1.26  | 0.82, 0.58-1.17 | 1.39, 0.73-2.64   |
| Whether needs assistance or has difficulty with self-care                    |                  |                   |                  |                  |                 |                   |
| No                                                                           |                  |                   |                  |                  |                 |                   |
| Yes                                                                          | 1.24, 1.05-1.46  | 1.13, 0.79-1.61   | 2.06, 1.04-4.09  | 1.2, 1.00-1.43   | 1.28, 0.88-1.86 | 1.64, 0.85-3.15   |
| Whether needs assistance or has difficulty with cognitive or emotional tasks |                  |                   |                  |                  |                 |                   |
| No                                                                           |                  |                   |                  |                  |                 |                   |
| Yes                                                                          | 3.00, 2.56-3.52  | 2.82, 2.09-3.80   | 3.77, 2.00-7.10  | 2.85, 2.37-3.42  | 2.30, 1.60-3.32 | 1.92, 1.04-3.53   |
| Whether needs assistance to cope with feelings or emotions                   |                  |                   |                  |                  |                 |                   |
| No                                                                           |                  |                   |                  |                  |                 |                   |
| Yes                                                                          | 1.85, 1.46-2.35  | 1.59, 0.99-2.55   | 2.80, 1.47-5.34  | 2.22, 1.64-3.00  | 1.72, 1.19-2.50 | 2.00, 0.79-5.12   |
| Whether needs assistance or has difficulty with household chores             |                  |                   |                  |                  |                 |                   |
| No                                                                           |                  |                   |                  |                  |                 |                   |
| Yes                                                                          | 1.42, 1.0-1.68   | 1.84, 1.30-2.60   | 0.41, 0.21-0.81  | 1.42, 1.19-1.69  | 0.98, 0.67-1.44 | 0.66, 0.32-1.33   |
| Number of impairment                                                         | 1.13, 1.08-1.18  | 1.18, 1.09-1.27   | 1.20, 1.03-1.39  | 1.13, 1.07-1.18  | 1.16, 1.07-1.26 | 1.23, 1.10-1.37   |

|                                             |                    |                    |                    |                    |                    |                     |
|---------------------------------------------|--------------------|--------------------|--------------------|--------------------|--------------------|---------------------|
| Nervous or emotional condition              |                    |                    |                    |                    |                    |                     |
| No                                          |                    |                    |                    |                    |                    |                     |
| Yes                                         | 1.67,<br>1.33-2.08 | 1.77,<br>1.13-2.78 | 2.04,<br>1.12-3.71 | 1.54,<br>1.17-2.03 | 2.31,<br>1.54-3.47 | 4.39,<br>1.64-11.77 |
| Shortness of breath or difficulty breathing |                    |                    |                    |                    |                    |                     |
| No                                          |                    |                    |                    |                    |                    |                     |
| Yes                                         | 1.28,<br>1.09-1.50 | 1.25,<br>0.92-1.69 | 2.37,<br>1.31-4.30 | 1.31,<br>1.11-1.56 | 1.15,<br>0.82-1.62 | 3.06,<br>1.65-5.67  |
| Cancer                                      |                    |                    |                    |                    |                    |                     |
| No                                          |                    |                    |                    |                    |                    |                     |
| Yes                                         | 1.21,<br>0.89-1.65 | 1.04,<br>0.55-1.99 | 1.06,<br>0.28-4.02 | 1.17,<br>0.84-1.62 | 0.56,<br>0.25-1.26 | 0.26,<br>0.09-0.82  |
| Endocrine condition                         |                    |                    |                    |                    |                    |                     |
| No                                          |                    |                    |                    |                    |                    |                     |
| Yes                                         | 0.97,<br>0.83-1.14 | 1.21,<br>0.92-1.61 | 0.93,<br>0.48-1.82 | 0.91,<br>0.77-1.09 | 0.67,<br>0.47-0.95 | 0.64,<br>0.33-1.22  |
| Psychological condition                     |                    |                    |                    |                    |                    |                     |
| No                                          |                    |                    |                    |                    |                    |                     |
| Yes                                         | 1.98,<br>1.61-2.44 | 1.46,<br>0.97-2.21 | 1.55,<br>0.74-3.28 | 2.05,<br>1.59-2.65 | 1.88,<br>1.12-3.16 | 0.58,<br>0.22-1.48  |
| Sight condition                             |                    |                    |                    |                    |                    |                     |
| No                                          |                    |                    |                    |                    |                    |                     |
| Yes                                         | 0.71,<br>0.53-0.96 | 0.77,<br>0.54-1.10 | 1.03,<br>0.35-3.09 | 0.85,<br>0.60-1.21 | 0.90,<br>0.47-1.73 | 1.15,<br>0.41-3.23  |
| Cardiovascular condition                    |                    |                    |                    |                    |                    |                     |
| No                                          |                    |                    |                    |                    |                    |                     |
| Yes                                         | 1.11,<br>0.96-1.29 | 1.11,<br>0.83-1.49 | 0.57,<br>0.30-1.08 | 1.07,<br>0.91-1.27 | 1.20,<br>0.84-1.71 | 1.84,<br>0.91-3.73  |
| Musculoskeletal condition                   |                    |                    |                    |                    |                    |                     |
| No                                          |                    |                    |                    |                    |                    |                     |
| Yes                                         | 0.99,<br>0.85-1.15 | 0.96,<br>0.73-1.27 | 1.33,<br>0.79-2.24 | 0.93,<br>0.77-1.12 | 0.98,<br>0.69-1.38 | 0.67,<br>0.34-1.30  |
| Symptoms and signs                          |                    |                    |                    |                    |                    |                     |
| No                                          |                    |                    |                    |                    |                    |                     |
| Yes                                         | 1.05,<br>0.83-1.33 | 1.35,<br>0.89-2.04 | 0.96,<br>0.45-2.04 | 1.09,<br>0.85-1.41 | 0.77,<br>0.45-1.30 | 0.49,<br>0.22-1.13  |

Supplementary Table 3.1. Odds ratios and 95% confidence intervals of predisposing factors in relation to high psychological distress by different impairment types, after excluding comorbid psychosocial impairment\*

| Variables^                     | Sensory         | Intellectual     | Physical        | Head injury      |
|--------------------------------|-----------------|------------------|-----------------|------------------|
| Age (years)                    |                 |                  |                 |                  |
| <=44                           |                 |                  |                 |                  |
| 45-64                          | 0.99, 0.48-2.01 | 0.43, 0.12-1.51  | 0.71, 0.54-0.95 | 0.15, 0-7.11     |
| 65-84                          | 0.55, 0.21-1.46 | 0.13, 0.01-1.70  | 0.35, 0.23-0.52 | 0, 0-0.21        |
| >=85                           | 0.38, 0.13-1.12 | 0, 0-1.49        | 0.24, 0.13-0.44 | 0, 0-0.46        |
| Country of birth               |                 |                  |                 |                  |
| Australia                      |                 |                  |                 |                  |
| Main English speaking          | 1.12, 0.71-1.76 | 1.23, 0.21-7.21  | 1.15, 0.89-1.47 | 1.42, 0.07-28.77 |
| Non-English speaking           | 2.33, 1.48-3.66 | 7.89, 0.73-85.27 | 2.41, 1.89-3.08 | 6.91, 0.48-99.79 |
| Marital Status                 |                 |                  |                 |                  |
| Married                        |                 |                  |                 |                  |
| Separated                      | 1.87, 0.95-3.69 | 9.88, 0.11-inf   | 0.82, 0.52-1.29 | 0.91, 0.02-38.08 |
| Divorced                       | 0.78, 0.42-1.43 | 0.67, 0.11-4.01  | 0.74, 0.57-0.97 | 0.81, 0.03-25.73 |
| Widowed                        | 0.60, 0.34-1.04 | 2.79, 0.14-54.00 | 0.66, 0.46-0.94 | 0.27, 0.01-7.43  |
| Never married                  | 0.59, 0.33-1.04 | 3.98, 1.49-10.65 | 0.62, 0.45-0.84 | 0.13, 0-6.49     |
| Sex                            |                 |                  |                 |                  |
| Male                           |                 |                  |                 |                  |
| Female                         | 1.00, 0.69-1.44 | 0.67, 0.11-4.23  | 0.77, 0.61-0.98 | 2.07, 0.21-20.65 |
| Highest educational attainment |                 |                  |                 |                  |
| Bachelor's degree or higher    |                 |                  |                 |                  |
| Diploma or certificate         | 1.33, 0.81-2.17 | 4.70, 0.66-33.31 | 1.27, 1.01-1.60 | 0.23, 0.01-4.75  |
| High school                    | 1.35, 0.81-2.25 | 2.35, 0.39-14.26 | 1.51, 1.26-1.82 | 0.60, 0.04-9.04  |
| Not finish high school         | 1.87, 1.11-3.16 | 4.57, 0.20-inf   | 1.75, 1.30-2.37 | 5.56, 0.12-inf   |
| Housing tenure                 |                 |                  |                 |                  |
| Outright owner                 |                 |                  |                 |                  |
| Owner with a mortgage          | 1.01, 0.60-1.71 | 0.78, 0.05-11.19 | 0.95, 0.74-1.23 | 0.03, 0-2.75     |
| Renter                         | 1.43, 0.92-2.23 | 0.25, 0.03-2.27  | 1.22, 0.96-1.56 | 1.27, 0.18-8.80  |
| Rurality of residence          |                 |                  |                 |                  |
| Major cities                   |                 |                  |                 |                  |
| Inner regional                 | 0.77, 0.49-1.20 | 0.41, 0.12-1.47  | 0.80, 0.62-1.02 | 1.99, 0.19-21.21 |
| Outer regional                 | 0.95, 0.64-1.40 | 0.64, 0.08-4.84  | 1.06, 0.86-1.32 | 3.60, 0.15-85.44 |
| Government concession cards    |                 |                  |                 |                  |
| No                             |                 |                  |                 |                  |
| Yes                            | 1.47, 0.82-2.66 | 0.61, 0.09-4.31  | 1.31, 1.04-1.66 | 12.35, 0.32-inf  |

\*Point and upper limit risk estimate values greater than 100 were replaced by "inf" sign.

^Unclassified categories were not presented

Supplementary Table 3.2. Odds ratios and 95% confidence intervals of enabling factors in relation to high psychological distress by different impairment types, after excluding comorbid psychosocial impairment\*

| Variables^                                                                                     | Sensory         | Intellectual     | Physical        | Head injury      |
|------------------------------------------------------------------------------------------------|-----------------|------------------|-----------------|------------------|
| Communication limitation                                                                       |                 |                  |                 |                  |
| No                                                                                             |                 |                  |                 |                  |
| Yes                                                                                            | 1.39, 0.95-2.04 | 2.70, 0.58-12.50 | 1.39, 1.06-1.82 | 1.72, 0.27-11.11 |
| Whether has avoided situations due to disability in the last 12 months                         |                 |                  |                 |                  |
| No                                                                                             |                 |                  |                 |                  |
| Yes                                                                                            | 1.40, 0.96-2.05 | 1.45, 0.31-6.71  | 1.17, 0.93-1.47 | 6.00, 0.45-80.12 |
| Feelings of safety home alone during the day                                                   |                 |                  |                 |                  |
| Safe                                                                                           |                 |                  |                 |                  |
| Unsafe                                                                                         | 0.36, 0.16-0.80 | 1.24, 0.05-30.5  | 1.16, 0.72-1.85 | 0.34, 0-76.98    |
| Feelings of safety home alone after dark                                                       |                 |                  |                 |                  |
| Safe                                                                                           |                 |                  |                 |                  |
| Unsafe                                                                                         | 2.31, 1.37-3.91 | 3.09, 0.47-20.49 | 1.85, 1.39-2.47 | 35.34, 0.73-inf  |
| Whether leaves home as often as would like                                                     |                 |                  |                 |                  |
| As often as would like                                                                         |                 |                  |                 |                  |
| Not as often as would like                                                                     | 1.51, 1.05-2.16 | 1.70, 0.41-7.03  | 1.74, 1.45-2.09 | 1.55, 0.13-18.74 |
| Whether support is available in a time of crisis from someone not living in the same household |                 |                  |                 |                  |
| No                                                                                             |                 |                  |                 |                  |
| Yes                                                                                            | 0.59, 0.35-0.98 | 0.52, 0.09-2.91  | 0.78, 0.59-1.02 | 6.77, 0.13-inf   |
| Whether attended selected cultural venues and events in last 12 months                         |                 |                  |                 |                  |
| No                                                                                             |                 |                  |                 |                  |
| Yes                                                                                            | 0.63, 0.44-0.90 | 0.38, 0.11-1.36  | 0.71, 0.59-0.85 | 0.33, 0.03-4.29  |

\*Point and upper limit risk estimate values greater than 100 were replaced by "inf" sign.

^Unclassified categories were not presented



Supplementary Table 3.3. Odds ratios and 95% confidence intervals of health-need factors in relation to high psychological distress by different impairment types, after excluding comorbid psychosocial impairment\*

| Variables^                                                                   | Sensory          | Intellectual     | Physical         | Head injury      |
|------------------------------------------------------------------------------|------------------|------------------|------------------|------------------|
| Saw GP in last 12 months                                                     |                  |                  |                  |                  |
| No need                                                                      |                  |                  |                  |                  |
| Delayed due to cost                                                          | 0.82, 0.24-2.75  | 2.21, 0.09-52.31 | 2.39, 1.12-5.11  | 15.15, 0-inf     |
| Delayed due to other reasons                                                 | 0.75, 0.34-1.67  | 1.01, 0.07-13.76 | 2.11, 1.08-4.11  | 0.06, 0-inf      |
| When needed                                                                  | 0.46, 0.22-0.97  | 0.81, 0.11-5.94  | 1.57, 0.80-3.09  | 0.10, 0-inf      |
| Went to hospital in last 12 months                                           |                  |                  |                  |                  |
| No need                                                                      |                  |                  |                  |                  |
| Delayed due to cost                                                          | inf, 0-inf       | inf, 0-inf       | 6.17, 1.05-36.32 | inf, 0-inf       |
| Delayed due to other reasons                                                 | 2.64, 0.14-48.37 | 1.46, 0.08-28.13 | 1.09, 0.51-2.33  | 4.18, 0-inf      |
| When needed                                                                  | 0.95, 0.73-1.25  | 0.94, 0.27-3.24  | 0.93, 0.75-1.15  | 2.58, 0.41-16.18 |
| Saw 3 or more health professionals for the same condition in last 12 months  |                  |                  |                  |                  |
| No                                                                           |                  |                  |                  |                  |
| Yes                                                                          | 1.10, 0.76-1.58  | 2.88, 0.80-10.36 | 1.12, 0.95-1.32  | 0.61, 0.06-5.88  |
| Saw a dental professional in last 12 months                                  |                  |                  |                  |                  |
| No need                                                                      |                  |                  |                  |                  |
| Delayed due to cost                                                          | 1.11, 0.67-1.85  | 1.31, 0.23-7.47  | 1.40, 1.11-1.78  | 0.38, 0.01-15.47 |
| Delayed due to other reasons                                                 | 0.88, 0.50-1.57  | 0.50, 0.07-3.51  | 0.96, 0.72-1.30  | 0.29, 0.01-16.09 |
| When needed                                                                  | 1.06, 0.70-1.61  | 0.29, 0.09-0.96  | 1.09, 0.91-1.31  | 3.91, 0.31-49.40 |
| Whether needs assistance or has difficulty with self-care                    |                  |                  |                  |                  |
| No                                                                           |                  |                  |                  |                  |
| Yes                                                                          | 1.03, 0.65-1.64  | 2.07, 0.48-8.99  | 1.18, 0.96-1.45  | 0.82, 0.08-8.05  |
| Whether needs assistance or has difficulty with cognitive or emotional tasks |                  |                  |                  |                  |
| No                                                                           |                  |                  |                  |                  |
| Yes                                                                          | 3.29, 2.07-5.22  | 2.71, 0.50-14.56 | 3.13, 2.45-3.99  | 3.80, 0.59-24.42 |
| Whether needs assistance to cope with feelings or emotions                   |                  |                  |                  |                  |
| No                                                                           |                  |                  |                  |                  |
| Yes                                                                          | 0.75, 0.35-1.63  | 0.04, 0.01-0.35  | 0.46, 0.30-0.70  | 0.77, 0.01-95.85 |
| Whether needs assistance or has difficulty with household chores             |                  |                  |                  |                  |
| No                                                                           |                  |                  |                  |                  |
| Yes                                                                          | 2.02, 1.38-2.98  | 0.43, 0.08-2.31  | 1.53, 1.22-1.93  | 2.68, 0.23-31.99 |
| Number of impairment                                                         | 1.13, 1.03-1.24  | 1.34, 0.79-2.27  | 1.11, 1.04-1.18  | 0.98, 0.54-1.80  |
| Nervous or emotional condition                                               |                  |                  |                  |                  |
| No                                                                           |                  |                  |                  |                  |
| Yes                                                                          | 1.31, 0.70-2.46  | 5.60, 1.15-27.29 | 1.27, 0.88-1.84  | 8.53, 0.06-inf   |
| Shortness of breath or difficulty breathing                                  |                  |                  |                  |                  |
| No                                                                           |                  |                  |                  |                  |

|                           |     |                 |                  |                 |                  |
|---------------------------|-----|-----------------|------------------|-----------------|------------------|
|                           | Yes | 1.31, 0.84-2.04 | 2.50, 0.52-11.98 | 1.41, 1.17-1.69 | 5.04, 0.48-53.22 |
| Cancer                    |     |                 |                  |                 |                  |
|                           | No  |                 |                  |                 |                  |
|                           | Yes | 1.38, 0.75-2.53 | 31.36, 0.37-inf  | 1.37, 0.90-2.07 | 0.16, 0-15.34    |
| Endocrine condition       |     |                 |                  |                 |                  |
|                           | No  |                 |                  |                 |                  |
|                           | Yes | 1.48, 1.04-2.10 | 1.06, 0.16-6.80  | 1.01, 0.86-1.17 | 2.09, 0.29-14.98 |
| Psychological condition   |     |                 |                  |                 |                  |
|                           | No  |                 |                  |                 |                  |
|                           | Yes | 1.73, 0.99-3.00 | 10.69, 0.83-inf  | 2.11, 1.57-2.85 | 0.54, 0.02-11.74 |
| Sight condition           |     |                 |                  |                 |                  |
|                           | No  |                 |                  |                 |                  |
|                           | Yes | 0.68, 0.41-1.12 | 0.26, 0-16.09    | 0.88, 0.59-1.30 | 0.78, 0.01-98.36 |
| Cardiovascular condition  |     |                 |                  |                 |                  |
|                           | No  |                 |                  |                 |                  |
|                           | Yes | 1.17, 0.82-1.66 | 0.37, 0.07-1.90  | 1.08, 0.86-1.34 | 2.32, 0.18-30.74 |
| Musculoskeletal condition |     |                 |                  |                 |                  |
|                           | No  |                 |                  |                 |                  |
|                           | Yes | 1.07, 0.72-1.58 | 1.88, 0.49-7.22  | 0.97, 0.79-1.20 | 1.48, 0.07-33.12 |
| Symptoms and signs        |     |                 |                  |                 |                  |
|                           | No  |                 |                  |                 |                  |
|                           | Yes | 1.41, 0.91-2.21 | 1.76, 0.22-14.00 | 1.20, 0.96-1.50 | 0.04, 0-1.61     |

\*Point and upper limit risk estimate values greater than 100 were replaced by "inf" sign.

^Unclassified categories were not presented
